# Supplementary material for: Novel machine learning models outperform risk scores in predicting hepatocellular carcinoma in patients with chronic viral hepatitis
Source: PubMed Central journal article supplement — JHEP Rep. 2022 Jan 22;4(3):100441. doi: 10.1016/j.jhepr.2022.100441 (PMC8844233; doi:10.1016/j.jhepr.2022.100441), 2022-01-22
Supplement: mmc1.pdf [file mmc1.pdf]

# Novel machine-learning models outperform risk scores in predicting hepatocellular carcinoma in patients with chronic viral hepatitis

Grace Lai-Hung Wong, Vicki Wing-Ki Hui, Qingxiong Tan, Jingwen Xu, Hye Won Lee, Terry Cheuk-Fung Yip, Baoyao Yang, Yee-Kit Tse, Chong Yin, Fei Lyu, Jimmy Che-To Lai, Grace Chung-Yan Lui, Henry Lik-Yuen Chan, Pong-Chi Yuen, Vincent Wai-Sun Wong

## Table of contents

|                |    |
|----------------|----|
| Table S1.....  | 2  |
| Table S2.....  | 4  |
| Table S3.....  | 6  |
| Table S4.....  | 6  |
| Table S5.....  | 7  |
| Table S6.....  | 8  |
| Table S7.....  | 9  |
| Table S8.....  | 10 |
| Table S9.....  | 11 |
| Table S10..... | 12 |
| Table S11..... | 13 |
| Table S12..... | 14 |
| Table S13..... | 15 |

Table S1. ICD-9-CM diagnosis and procedure codes for hepatic complications, liver cirrhosis, liver transplantation, HCC, and co-morbidities.

| Disease                                   | ICD-9-CM Code | Description                                                                                                 |
|-------------------------------------------|---------------|-------------------------------------------------------------------------------------------------------------|
| <b>Hepatitis</b>                          |               |                                                                                                             |
| Chronic hepatitis B                       | 070.22        | Chronic viral hepatitis B with hepatic coma without hepatitis delta                                         |
| Chronic hepatitis B                       | 070.23        | Chronic viral hepatitis B with hepatic coma with hepatitis delta                                            |
| Chronic hepatitis B                       | 070.32        | Chronic viral hepatitis B without mention of hepatic coma without mention of hepatitis delta                |
| Chronic hepatitis B                       | 070.33        | Chronic viral hepatitis B without mention of hepatic coma with hepatitis delta                              |
| Chronic hepatitis B                       | V02.61        | Hepatitis B carrier                                                                                         |
| Acute hepatitis B                         | 070.20        | Viral hepatitis B with hepatic coma, acute or unspecified, without mention of hepatitis delta               |
| Acute hepatitis B                         | 070.21        | Viral hepatitis B with hepatic coma, acute or unspecified, with hepatitis delta                             |
| Acute hepatitis B                         | 070.30        | Viral hepatitis B without mention of hepatic coma, acute or unspecified, without mention of hepatitis delta |
| Acute hepatitis B                         | 070.31        | Viral hepatitis B without mention of hepatic coma, acute or unspecified, with hepatitis delta               |
| Hepatitis C                               | 070.41        | Acute hepatitis C with hepatic coma                                                                         |
| Hepatitis C                               | 070.44        | Chronic hepatitis C with hepatic coma                                                                       |
| Hepatitis C                               | 070.51        | Acute hepatitis C without mention of hepatic coma                                                           |
| Hepatitis C                               | 070.54        | Chronic hepatitis C without mention of hepatic coma                                                         |
| Hepatitis C                               | V02.62        | Hepatitis C carrier                                                                                         |
| Hepatitis D                               | 070.23        | Chronic viral hepatitis B with hepatic coma with hepatitis delta                                            |
| Hepatitis D                               | 070.33        | Chronic viral hepatitis B without mention of hepatic coma with hepatitis delta                              |
| Hepatitis D                               | 070.42        | Hepatitis delta without mention of active hepatitis B disease with hepatic coma                             |
| Hepatitis D                               | 070.52        | Hepatitis delta without mention of active hepatitis B disease or hepatic coma                               |
| <b>Human immunodeficiency virus (HIV)</b> |               |                                                                                                             |
| HIV                                       | 042           | Human immunodeficiency virus [HIV] disease.                                                                 |
| HIV                                       | 079.53        | Human immunodeficiency virus, type 2 [HIV-2]                                                                |
| HIV                                       | V02.9:1       | HIV carrier                                                                                                 |
| HIV                                       | V08           | Asymptomatic human immunodeficiency virus [HIV] infection status                                            |
| <b>Hepatic complications</b>              |               |                                                                                                             |
| Ascites                                   | 789.5         | Ascites                                                                                                     |
| SBP                                       | 567.2:9       | Spontaneous bacterial peritonitis                                                                           |
| SBP                                       | 567.8:0       | Peritonitis                                                                                                 |
| EVB <sup>#</sup>                          | 456.0         | Esophageal varices with bleeding                                                                            |
| EVB                                       | 456.20        | Esophageal varices classified elsewhere with bleeding                                                       |
| GVB <sup>#</sup>                          | 456.8:1       | Fundal varices, bleeding                                                                                    |
| GVB                                       | 456.8:2       | Bleeding gastric varices                                                                                    |
| HE                                        | 348.3         | Encephalopathy, unspecified                                                                                 |
| HE                                        | 349.82        | Toxic encephalopathy                                                                                        |
| HE                                        | 572.2         | Hepatic coma                                                                                                |

|                                       |                  |                                                                      |
|---------------------------------------|------------------|----------------------------------------------------------------------|
| HRS                                   | 572.4            | Hepatorenal syndrome                                                 |
| Portal hypertension                   | 572.3            | Portal hypertension                                                  |
| Varices                               | 456.1            | Esophageal varices without bleeding                                  |
| Varices                               | 456.21           | Esophageal varices in diseases classified elsewhere without bleeding |
| Varices                               | 456.8:4          | Fundal varices                                                       |
| Varices                               | 456.8:5          | Gastric varices                                                      |
| <b>Liver cirrhosis</b>                |                  |                                                                      |
| Liver cirrhosis                       | 571.2            | Alcoholic cirrhosis of liver                                         |
| Liver cirrhosis                       | 571.5            | Cirrhosis of liver without mention of alcohol                        |
| <b>Liver transplantation</b>          |                  |                                                                      |
| Liver transplantation                 | V42.7            | Liver replaced by transplant                                         |
| Liver transplantation                 | 50.51            | Auxiliary liver transplant                                           |
| Liver transplantation                 | 50.59            | Other transplant of liver                                            |
| <b>Hepatocellular carcinoma (HCC)</b> |                  |                                                                      |
| HCC                                   | 155.0            | Malignant neoplasm of liver, primary                                 |
| HCC                                   | 155.2            | Malignant neoplasm of liver, not specified                           |
| HCC*                                  | 197.7            | Secondary malignant neoplasm of liver                                |
| <b>Co-morbidities</b>                 |                  |                                                                      |
| Hypertension                          | 401              | Essential hypertension                                               |
| Hypertension                          | 401.0            | Malignant essential hypertension                                     |
| Hypertension                          | 401.1            | Benign essential hypertension                                        |
| Hypertension                          | 401.9            | Unspecified essential hypertension                                   |
| Chronic kidney disease                | 585.1-585.9, 586 | Chronic kidney disease                                               |
| Hyperlipidemia                        | 272.0-272.9      | Hyperlipidemia, Hypercholesterolemia                                 |
| Osteopenia                            | 733.9            | Osteopenia                                                           |
| Osteoporosis                          | 733.00-733.01    | Osteoporosis                                                         |
| Neoplasms                             | 140 to 239       | Neoplasms, malignancies, cancers                                     |
| Mental disorders                      | 280 to 289       | Mental disorders                                                     |
| Diabetes mellitus                     | 250.0-250.9      | Diabetes mellitus                                                    |
| Cardiovascular disease                | 390 to 459       | Cardiovascular disease                                               |

\* ICD-9-CM diagnosis code 197.7 was treated as primary liver cancer if there was no other primary cancer coded; the definition of HCC also considered the ICD-9-CM procedure codes of 50.22, 50.99, 50.29, 50.94, 38.80, and 88.47

# Esophageal or gastric variceal bleeding was also defined by the ICD-9-CM procedure codes of 42.33:3, 42.33:6, 42.33:13, and 43.41:1

Abbreviations: EVB = esophageal variceal bleeding; GVB = gastric variceal bleeding, HCC = hepatocellular carcinoma, HE = hepatic encephalopathy, HIV = human immunodeficiency virus, HRS = hepatorenal syndrome, ICD-9-CM = International Classification of Diseases, Ninth Revision, Clinical Modification, SBP = spontaneous bacterial peritonitis.

Table S2. Drug codes of nucleos(t)ide analogues and other concomitant medications used in Hospital Authority internally.

| <b>Drug code</b>             | <b>Name</b>                   | <b>Dosage</b>                 |
|------------------------------|-------------------------------|-------------------------------|
| <b>Antiviral treatment</b>   |                               |                               |
| ADEF01                       | Adefovir Dipivoxil            | 10 MG                         |
| ENTE01/02                    | Entecavir                     | 0.5 MG/1.0 MG                 |
| INTE04/05/18/19              | Interferon alpha-2a           | 3-9MIU/0.5-1ML                |
| INTE06-09/16-17              | Interferon alpha-2b           | 3/5/10/15/25 MIU/1ML          |
| LAMI07/08/09/10              | Lamivudine                    | 150 MG/10 MG/ML/100MG         |
| PEGI01-03/05/09-12/18-21     | Peginterferon alpha-2b        | 50-120 MCG/0.5-1ML            |
| PEGI04/06-08/13/15-17        | Peginterferon alpha-2a        | 135-180 MCG/0.5-1ML           |
| PEGI14                       | Peginterferon lambda-1a       | 180 MCG/0.45ML                |
| TELB01                       | Telbivudine                   | 600 MG                        |
| TENO03/04/07                 | Tenofovir Disoproxil Fumarate | 300 MG                        |
| TENO06/08                    | Tenofovir Alafenamide         | 25 MG                         |
| <b>Anti-diabetic agents</b>  |                               |                               |
| ACAR01/02                    | Acarbose                      | 100 MG / 50 MG                |
| ACTO09                       | Actosmet                      | 15 MG / 850 MG                |
| ALOG01/02                    | Alogliptin                    | 25 MG / 12.5 MG               |
| AVAN03/04                    | Avadma,et                     | 2 or 4 MG / 1000 MG           |
| S01057                       | Canagliflozin                 | 100 MG                        |
| CHLO51                       | Chlorpropamide                | 250 MG                        |
| DAPA01                       | Dapagliflozin                 | 10 MG                         |
| EMPA01/02                    | Empagliflozin                 | 10 MG / 25 MG                 |
| EXEN03/04/05                 | Exenatide                     | 5 MCG / 10 MCG                |
| GALV01/02/03                 | Galvus Met                    | 50 MG / 500 or 1000 or 850 MG |
| GLIB01/02                    | Glibenclamide                 | 2.5 MG / 5 MG                 |
| GLIC01/02/03                 | Gliclazide                    | 80 MG / 30 MG / 60 MG         |
| GLIP01                       | Glipizide                     | 5 MG                          |
| JANU01/02                    | Janumet                       | 50 MG / 500 or 1000 MG        |
| LINA01                       | Linagliptin                   | 5 MG                          |
| LIRA01/02                    | Liraglutide                   | 6 MG/ML                       |
| LIXI01/02                    | Lixisenatide                  | 10 MCG / 20 MCG               |
| METF01/02/03/05              | Metformin                     | 250 MG / 500 MG / 1000 MG     |
| OSEN01/02                    | Oseni                         | 25 MG / 15 or 30 MG           |
| PIOG01/02                    | Pioglitazone                  | 30 MG / 15 MG                 |
| ROSI01/02/03                 | Rosiglitazone                 | 2 MG / 4 MG / 8 MG            |
| SITA02/03/06                 | Sitagliptin                   | 50 MG / 100 MG / 25 MG        |
| TOLB01                       | Tolbutamide                   | 500 MG                        |
| TRAJ01/02                    | Trajenta Duo                  | 2.5 MG / 500 or 1000 MG       |
| VILD01                       | Vildagliptin                  | 50 MG                         |
| INSU01-53                    | Insulin                       | 100U / ML                     |
| <b>Lipid-lowering agents</b> |                               |                               |
| ATOR01/02/03/04              | Atorvastatin                  | 10 MG / 20 MG / 40 MG / 80 MG |
| FLUV02/03/05                 | Fluvastatin                   | 20 MG / 40 MG / 80 MG         |
| LOVA01                       | Lovastatin                    | 20 MG                         |
| PRAV01/02                    | Pravastatin                   | 10 MG / 20 MG                 |

|                                 |                     |                                      |
|---------------------------------|---------------------|--------------------------------------|
| ROSU01/02                       | Rosuvastatin        | 10 MG / 20 MG                        |
| SIMV01/02/04/05                 | Simvastatom         | 10 MG / 20 MG / 40 MG / 80 MG        |
| BEZA01/02                       | Bezafibrate         | 200 MG / 400 MG                      |
| EXE01                           | Ezetimibe           | 10 MG                                |
| FENO01/05/06/07                 | Fenofibrate         | 100 MG / 200 MG /160 MG / 145 MG     |
| GEMF01/02/03                    | Gemfibrozil         | 300 MG / 600 MG / 900 MG             |
| <b>Anti-hypertensive agents</b> |                     |                                      |
| AMLO01/02/03                    | Amlodipine          | 10 MG / 5 MG                         |
| ATEN01/02                       | Atenolol            | 50 MG / 100 MG                       |
| CADN01/02                       | Candesartan         | 8 MG / 16 MG                         |
| CAPT01/02/03/04/06              | Captopril           | 25 MG / 50 MG / 12.5 MG / 6.25 MG    |
| CARV01/02/03/04                 | Caredilol           | 25 MG / 12.5 MG / 6.25 MG / 3.125 MG |
| CO-D01/02                       | Co-Diovan           | 80 or 160 MG / 12.5 MG               |
| DILT01-08                       | Diltiazem           | 25 MG – 200 MG                       |
| DOXA03/05/06                    | Doxazosin           | 2 MG / 4 MG / 8 MG                   |
| ENAL01/02/03/04                 | Enalapril           | 20 MG / 10 MG / 5 MG / 1 MG          |
| FEL01/02/03                     | Felodipine          | 5 MG / 10 MG / 2.5 MG                |
| HYDR01/02/03/65                 | Hydralazine         | 10 MG / 25 MG / 50 MG / 20 MG        |
| HYDR05/30/38                    | Hydrochlorothiazide | 20 MG / 25 MG / 2 MG/ML              |
| INDA01/02                       | Indapamide          | 2.5 MG / 1.5 MG                      |
| IRBE01/02/03/04                 | Irbesartan          | 150 MG / 300 MG                      |
| LABE01/02/03/04/05              | Labetalol           | 100 MG / 200 MG / 50 MG              |
| LERC01                          | Lercanidipine       | 10 MG                                |
| LISI01/02/03                    | Lisinopril          | 5 MG / 10 MG / 20 MG                 |
| LOSA01/02/03/04                 | Losartan            | 50 MG / 100 MG                       |
| METH22/23/78                    | Methyl dopa         | 125 MG / 250 MG / 50 MG/ML           |
| METO09-17                       | Metoprolol          | 100 MG / 50 MG / 25 MG               |
| NIFE01-05                       | Nifedipine          | 5 MG / 20 MG / 30 MG / 60 MG         |
| NIMO01/02                       | Nimodipine          | 30 MG / 10 MG/50ML                   |
| PERI17/28/29                    | Perinopril          | 2 MG / 4 MG / 5 MG                   |
| PRAZ03/04/05                    | Prazosin            | 1 MG / 2 MG / 5 MG                   |
| PROP04-30                       | Propranolol         | 1 MG – 160 MG                        |
| RAMI01/02                       | Ramipril            | 2.5 MG / 5 MG                        |
| TELM01/02                       | Telmisartan         | 40 MG / 80 MG                        |
| VALS02/03                       | Valsartan           | 80 MG / 160 MG                       |
| VERA01/02/03/04                 | Verapamil           | 40 MG / 80 MG / 240 MG / 5MG/2ML     |

Table S3. List of viral serological markers retrieved.

| <b>HBV</b>                   | <b>HCV</b>                | <b>HDV</b> |
|------------------------------|---------------------------|------------|
| Anti-HBc                     | Anti-HCV                  | Anti-HDV   |
| Anti-HBc IgM                 | HCV RNA (viral load), RT- |            |
| Anti-HBe                     | HCV RNA, RT-PCR           |            |
| Anti-HBs                     |                           |            |
| Anti-HBs, Quantitative       |                           |            |
| HBeAg                        |                           |            |
| HBsAg                        |                           |            |
| HBV DNA                      |                           |            |
| HBV DNA (viral load), RT-PCR |                           |            |

Anti-HBc = antibody to hepatitis B core antigen; Anti-HBe = antibody to hepatitis B e antigen; Anti-HBs = antibody to hepatitis B surface antigen; HBeAg = hepatitis B e antigen; HBsAg = hepatitis B surface antigen; HBV = hepatitis B virus; HCV = hepatitis C virus; HDV = hepatitis D virus; IgM = immunoglobulin M; RT-PCR = Reverse transcription polymerase chain reaction.

Table S4. Serum test formulae for liver fibrosis.

| <b>PARAMETERS OR INDEX</b> | <b>FORMULA</b>                                                                                                                                                                   |
|----------------------------|----------------------------------------------------------------------------------------------------------------------------------------------------------------------------------|
| <b>APRI</b>                | $\frac{\text{AST level of patient}}{\text{AST upper limit of normal}} \times \frac{100\%}{\text{Platelet count (10}^9\text{/L)}}$                                                |
| <b>FORNS INDEX</b>         | $7.811 - 3.131 \times \ln(\text{platelet count (10}^9\text{/L)}) + 0.781 \times \ln(\text{GGT (IU/L)}) + 3.467 \times \ln(\text{age}) - 0.014 \times \text{cholesterol (mg/dL)}$ |
| <b>FIB-4</b>               | $\frac{\text{Age (years)} \times \text{AST (U/L)}}{\text{Platelet count (10}^9\text{/L)} \times \sqrt{\text{ALT (U/L)}}}$                                                        |

Table S5. The detailed parameters for the machine learning models

| Machine learning model | Detailed model parameters                                                                                  |                                                  |
|------------------------|------------------------------------------------------------------------------------------------------------|--------------------------------------------------|
| Logistic regression    | Maximum number of iterations                                                                               | 100                                              |
|                        | Optimization Algorithm                                                                                     | "Newton-CG" algorithm                            |
| +Ridge regression      | Maximum number of iterations                                                                               | 1000                                             |
| AdaBoost               | <b>Base estimator</b><br>(The base estimator from which the boosted ensemble is built)                     | Decision Tree Classifier with max depth of 1     |
|                        | <b>The number of estimators</b><br>(The maximum number of estimators at which boosting is terminate)       | 50                                               |
|                        | <b>Learning rate</b>                                                                                       | 1.0                                              |
| +Decision tree         | <b>Max depth</b><br>(The maximum depth of the tree)                                                        | 10                                               |
|                        | <b>Criterion</b><br>(The function to measure the quality of a split)                                       | Gini Impurity                                    |
|                        | <b>Max features</b><br>(The number of features to consider when looking for the best split)                | Select parameter number (20,36,or all)           |
|                        | <b>Splitter</b><br>(The strategy used to choose the split at each node)                                    | Use the "best" strategy to choose the best split |
|                        | <b>minimum samples of each leaf</b><br>(The minimum number of samples required to be at a leaf node)       | 1                                                |
| +Random Forest         | <b>The number of trees in the forest</b>                                                                   | 20                                               |
|                        | <b>Max depth</b><br>(The maximum depth of the tree)                                                        | 10                                               |
|                        | <b>Max features</b><br>(The number of features to consider when looking for the best split)                | Select parameter number (20,36,or all)           |
|                        | <b>Samples of each leaf</b><br>(The minimum number of samples required to be at a leaf node)               | 1                                                |
|                        | <b>The minimum samples for split</b><br>(The minimum number of samples required to split an internal node) | 2                                                |

**Reference:**

- [1] Hilbe JM. Logistic regression models. Boca Raton, Florida, USA: CRC press; 2009.
- [2] Montgomery DC, Peckl EA, Vining GG. Introduction to linear regression analysis. Hoboken, New Jersey, USA: John Wiley & Sons; 2015.
- [3] Freund Y, Schapire RE. A decision-theoretic generalization of on-line learning and an application to boosting. In: Dresher M, Tucker AW, Wolfe P, eds. European conference on computational learning theory. Berlin/Heidelberg, Germany: Springer Berlin Heidelberg; 1995:23-37.
- [4] Breiman L, Friedman J, Stone CJ, Olshen RA. Classification and regression trees. CRC Press; 1984.
- [5] Svetnik V, Liaw A, Tong C, Culberson JC, Sheridan RP, Feuston BP. Random forest: a classification and regression tool for compound classification and QSAR modeling. Journal of chemical information and computer sciences. 2003 Nov 24;43(6):1947-58.
- [6] Pedregosa F., Varoquaux G., Gramfort A., Michel V., Thirion B., Grisel O., and Duchesnay E. Scikit-learn: Machine learning in Python. the Journal of machine Learning research, 2011, 12, 2825-2830.

Table S6. Antiviral treatment received by patients cumulated over the four periods.

| Period                                                    | 2000 – 2004   | 2005 – 2009   | 2010 – 2013    | 2014 – 2018    |
|-----------------------------------------------------------|---------------|---------------|----------------|----------------|
| <b>Antiviral treatment for chronic hepatitis B (n, %)</b> |               |               |                |                |
| Lamivudine                                                | 2,059(10.80%) | 4,934(10.10%) | 7,985(9.30%)   | 9,464(7.46%)   |
| Adefovir Dipivoxil                                        | 38(0.20%)     | 1,180(2.41%)  | 2,611(3.04%)   | 2,954(2.33%)   |
| Entecavir                                                 | 0(0.00%)      | 1,214(2.48%)  | 7,709(8.98%)   | 42,494(33.49%) |
| Telbivudine                                               | 0(0.00%)      | 229(0.47%)    | 1,443(1.68%)   | 2,741(2.16%)   |
| Tenofovir*                                                | 3(0.02%)      | 102(0.21%)    | 1,007(1.17%)   | 6,036(4.76%)   |
| Any nucleos(t)ide analogues                               | 2,077(10.90%) | 6,642(13.59%) | 16,512(19.23%) | 51,191(40.34%) |
| Conventional interferon                                   | 99(0.52%)     | 53(0.11%)     | 63(0.07%)      | 72(0.06%)      |
| Peginterferon                                             | 11(0.06%)     | 375(0.77%)    | 690(0.80%)     | 909(0.72%)     |
| Any antiviral treatment                                   | 2,248(11.79%) | 5,889(12.05%) | 15,249(17.76%) | 51,572(40.64%) |
| <b>Cumulative no. of CHB patients</b>                     | <b>19,060</b> | <b>48,869</b> | <b>85,880</b>  | <b>126,890</b> |
| <b>Antiviral treatment for chronic hepatitis C (n, %)</b> |               |               |                |                |
| Conventional or pegylated interferon +<br>ribavirin       | 1,593(29.71%) | 2,754(30.41%) | 3,926(31.84%)  | 5,219(31.05%)  |
| Sofosbuvir/velpatasvir                                    | 0(0.00%)      | 0(0.00%)      | 0(0.00%)       | 273(1.62%)     |
| Sofosbuvir/ledipasvir                                     | 0(0.00%)      | 0(0.00%)      | 0(0.00%)       | 12(0.07%)      |
| Dasabuvir/Ombitasvir/paritaprevir<br>combination therapy  | 0(0.00%)      | 0(0.00%)      | 0(0.00%)       | 119(0.71%)     |
| Elbasvir/Grazoprevir                                      | 0(0.00%)      | 0(0.00%)      | 0(0.00%)       | 0(0.00%)       |
| Asunaprevir+/-Daclatasvir                                 | 0(0.00%)      | 0(0.00%)      | 0(0.00%)       | 107(0.64%)     |
| Glecaprevir/Pibrentasvir                                  | 0(0.00%)      | 0(0.00%)      | 0(0.00%)       | 6(0.04%)       |
| Boceprevir                                                | 0(0.00%)      | 0(0.00%)      | 1(0.01%)       | 3(0.01%)       |
| Any antiviral treatment                                   | 1,593(29.71%) | 2,754(30.41%) | 3,927(31.84%)  | 5,660(33.67%)  |
| <b>Cumulative no. of CHC patients</b>                     | <b>5,362</b>  | <b>9,056</b>  | <b>12,335</b>  | <b>16,811</b>  |

Descriptive statistics were calculated after subtraction of missing data from denominator.

CHB = chronic hepatitis B ; CHC = chronic hepatitis C; NA = nucleos(t)ide analogues.

Table S7. Untreated Patients with advanced fibrosis during follow-up based on serum formulae – current situation and projected disease burden (only in patients with results of at least one of the three serum fibrosis scores)

| Period                                                | 2000 – 2004                 | 2005 – 2009                 | 2010 – 2013                 | 2014 – 2018                 |
|-------------------------------------------------------|-----------------------------|-----------------------------|-----------------------------|-----------------------------|
| <b>Patients with chronic hepatitis B (N = 44,193)</b> |                             |                             |                             |                             |
| No. of subjects                                       | <b>N = 3,032</b>            | <b>N = 11,143</b>           | <b>N = 13,550</b>           | <b>N = 16,468</b>           |
| APRI                                                  | 1.90(6.28)<br>0.63[0.,1.56] | 1.02(3.45)<br>0.43[0.,0.90] | 0.93(2.64)<br>0.39[0.,0.75] | 1.10(6.12)<br>0.38[0.,0.75] |
| Missing (%)                                           | 214(7.06%)                  | 835(7.49%)                  | 1577(11.64%)                | 1932(11.73%)                |
| Forns index                                           | 6.05(2.70)                  | 5.83(2.34)                  | 5.95(2.21)                  | 6.32(2.34)                  |
| Missing (%)                                           | 2305(76.02%)                | 7034(63.12%)                | 8230(60.74%)                | 9163(55.64%)                |
| FIB-4                                                 | 0.75(1.98)<br>0.30[0.,0.72] | 0.55(1.93)<br>0.26[0.,0.51] | 0.62(2.05)<br>0.29[0.,0.53] | 0.84(4.53)<br>0.32[0.,0.61] |
| Missing (%)                                           | 215(7.09%)                  | 835(7.49%)                  | 1579(11.65%)                | 1933(11.74%)                |
| Advanced liver fibrosis                               | 662(21.83%)                 | 1444(12.96%)                | 1499(11.06%)                | 2244(13.63%)                |
| APRI ≥ 2                                              | 552(19.59%)                 | 1017(9.87%)                 | 948(7.92%)                  | 1307(8.99%)                 |
| FIB-4 ≥ 3.25                                          | 98(3.48%)                   | 176(1.71%)                  | 246(2.05%)                  | 447(3.08%)                  |
| Forns index ≥ 8.4                                     | 163(22.42%)                 | 609(14.82%)                 | 725(13.63%)                 | 1211(16.58%)                |
| ALT > 2xULN                                           | 759(25.04%)                 | 1954(17.54%)                | 1732(12.78%)                | 2075(12.60%)                |
| Missing (%)                                           | 1(0.03%)                    | 0(0.00%)                    | 2(0.01%)                    | 0(0.00%)                    |
| <b>Patients with chronic hepatitis C (N = 5,249)</b>  |                             |                             |                             |                             |
| No. of subjects                                       | <b>N = 1,105</b>            | <b>N = 1,357</b>            | <b>N = 1,272</b>            | <b>N = 1,515</b>            |
| APRI                                                  | 1.45(5.27)<br>0.56[0.,1.32] | 1.26(2.71)<br>0.56[0.,1.15] | 1.19(2.03)<br>0.54[0.,1.19] | 1.17(3.97)<br>0.49[0.,0.95] |
| Missing (%)                                           | 34(3.08%)                   | 99(7.30%)                   | 121(9.51%)                  | 155(10.23%)                 |
| Forns index                                           | 7.30(2.45)                  | 7.08(2.42)                  | 7.01(2.47)                  | 6.56(2.26)                  |
| Missing (%)                                           | 962(87.06%)                 | 995(73.32%)                 | 880(69.18%)                 | 983(64.88%)                 |
| FIB-4                                                 | 0.64(1.29)<br>0.34[0.,0.67] | 0.72(1.70)<br>0.34[0.,0.71] | 0.75(1.71)<br>0.35[0.,0.70] | 0.83(4.31)<br>0.33[0.,0.63] |
| Missing (%)                                           | 34(3.08%)                   | 99(7.30%)                   | 121(9.51%)                  | 155(10.23%)                 |
| Advanced liver fibrosis                               | 206(18.64%)                 | 239(17.61%)                 | 252(19.81%)                 | 206(13.60%)                 |
| APRI ≥ 2                                              | 174(16.25%)                 | 172(13.67%)                 | 168(14.60%)                 | 131(9.63%)                  |
| FIB-4 ≥ 3.25                                          | 21(1.96%)                   | 40(3.18%)                   | 44(3.82%)                   | 39(2.87%)                   |
| Forns index ≥ 8.4                                     | 50(34.97%)                  | 101(27.90%)                 | 114(29.08%)                 | 99(18.61%)                  |
| ALT > 2xULN                                           | 241(21.81%)                 | 266(19.60%)                 | 254(19.97%)                 | 266(17.56%)                 |
| Missing (%)                                           | 0(0.00%)                    | 0(0.00%)                    | 0(0.00%)                    | 0(0.00%)                    |

APRI = AST to Platelet Ratio Index.

Table S8. Diagnostic accuracy of the HCC-RS using selected parameters at different cut-offs in the training (n=86,804) and validation (n=37,202) cohorts.

| Cohort            | Cut-off | n (%)<br>(≥ cut-off) | Sensitivity (%)<br>(95% CI) | Specificity (%)<br>(95% CI) | PPV (%)<br>(95% CI)    | NPV (%)<br>(95% CI)    |
|-------------------|---------|----------------------|-----------------------------|-----------------------------|------------------------|------------------------|
| Training cohort   | 0.1     | 21,652 (24.94)       | 0.7276 [0.7165-0.7382]      | 0.7913 [0.7886-0.7942]      | 0.2292 [0.2238-0.2350] | 0.9715 [0.9703-0.9728] |
|                   | 0.2     | 6,315 (7.28)         | 0.3466 [0.3347-0.3578]      | 0.9506 [0.9491-0.9521]      | 0.3743 [0.3622-0.3864] | 0.9446 [0.9429-0.9462] |
|                   | 0.3     | 2,158 (2.49)         | 0.1182 [0.1105-0.1260]      | 0.9831 [0.9822-0.9839]      | 0.3735 [0.3523-0.3954] | 0.9289 [0.9272-0.9307] |
|                   | 0.4     | 329 (0.38)           | 0.0172 [0.0143-0.0203]      | 0.9973 [0.9970-0.9977]      | 0.3556 [0.3055-0.4091] | 0.9225 [0.9207-0.9243] |
|                   | 0.5     | 2 (0.00)             | 0.0000 [0.0000-0.0000]      | 1.0000 [0.9999-1.0000]      | 0.0000 [0.0000-0.0000] | 0.9214 [0.9203-0.9239] |
|                   | 0.6     | 0 (0.00)             | 0.0000 [0.0000-0.0000]      | 1.0000 [1.0000-1.0000]      | nan                    | 0.9214 [0.9196-0.9232] |
|                   | 0.7     | 0 (0.00)             | 0.0000 [0.0000-0.0000]      | 1.0000 [1.0000-1.0000]      | nan                    | 0.9214 [0.9196-0.9232] |
| Validation cohort | 0.1     | 9,216 (24.77)        | 0.7263 [0.7092-0.7420]      | 0.7924 [0.7882-0.7965]      | 0.2266 [0.2176-0.2355] | 0.9719 [0.9698-0.9738] |
|                   | 0.2     | 2,622 (7.05)         | 0.3492 [0.3309-0.3667]      | 0.9529 [0.9507-0.9552]      | 0.3829 [0.3644-0.4022] | 0.9459 [0.9434-0.9483] |
|                   | 0.3     | 932 (2.51)           | 0.1343 [0.1221-0.1468]      | 0.9841 [0.9828-0.9854]      | 0.4142 [0.3839-0.4457] | 0.9314 [0.9288-0.9342] |
|                   | 0.4     | 122 (0.33)           | 0.0167 [0.0120-0.0216]      | 0.9978 [0.9974-0.9983]      | 0.3934 [0.3143-0.4806] | 0.9238 [0.9211-0.9267] |
|                   | 0.5     | 1 (0.00)             | 0.0003 [0.0003-0.0004]      | 1.0000 [1.0000-1.0000]      | 1.0000 [1.0000-1.0000] | 0.9227 [0.9205-0.9251] |
|                   | 0.6     | 0 (0.00)             | 0.0000 [0.0000-0.0000]      | 1.0000 [1.0000-1.0000]      | nan                    | 0.9227 [0.9200-0.9254] |
|                   | 0.7     | 0 (0.00)             | 0.0000 [0.0000-0.0000]      | 1.0000 [1.0000-1.0000]      | nan                    | 0.9227 [0.9200-0.9254] |

CI=confidence interval, NPV=negative predictive value, PPV=positive predictive value

Table S9. Area under the receiver operating characteristic curve (AUROC) and the 95% confidence interval of the machine learning models in the training cohort and external validation cohort of 4,462 Korean patients.

| Machine learning model | *Training cohort:<br>N = 86,804, HCC = 6,821 | ^Validation cohort:<br>N =4,462, HCC = 1,072 |
|------------------------|----------------------------------------------|----------------------------------------------|
|                        | <i>Selected parameters<br/>(num=20)</i>      | <i>Selected parameters<br/>(num=20)</i>      |
| Logistic regression    | 0.814±0.006                                  | 0.813±0.009                                  |
| Ridge regression       | 0.817±0.006                                  | 0.819±0.006                                  |
| AdaBoost               | 0.822±0.006                                  | 0.821±0.009                                  |
| Decision tree          | 0.877±0.005                                  | 0.799±0.030                                  |
| Random Forest          | 0.987±0.003                                  | 0.801±0.030                                  |

\*AUROC of the five machine learning algorithms were overall difference in training cohort,  $P<0.05$ .

^AUROC of the five machine learning algorithms were overall difference in validation cohort,  $P<0.05$ .

ˆ AUROC higher than decision tree in validation cohort,  $P<0.05$

Table S10. Accuracy of the machine learning models using selected parameters in diagnosing HCC in the external validation cohort of 4,462 Korean patients.

| Machine learning algorithm | Dual Cut-offs | n (%)<br>(< lower cut-off /<br>≥ upper cut-off) | Sensitivity (%)<br>(95% CI) | Specificity (%)<br>(95% CI) | PPV (%)<br>(95% CI) | NPV (%)<br>(95% CI) |
|----------------------------|---------------|-------------------------------------------------|-----------------------------|-----------------------------|---------------------|---------------------|
| Logistic regression        | 0.21          | 2,215 (49.7)                                    | 0.90 (0.89-0.91)            | 0.542 (0.539-0.545)         | 0.137 (0.134-0.140) | 0.973 (0.969-0.977) |
|                            | 0.32          | 571 (12.8)                                      | 0.42 (0.39-0.45)            | 0.900 (0.896-0.902)         | 0.276 (0.273-0.279) | 0.948 (0.944-0.952) |
| Ridge regression           | 0.08          | 2,293 (51.4)                                    | 0.90 (0.89-0.91)            | 0.587 (0.583-0.591)         | 0.154 (0.150-0.158) | 0.983 (0.980-0.986) |
|                            | 0.16          | 597 (13.4)                                      | 0.41 (0.37-0.45)            | 0.900 (0.897-0.903)         | 0.268 (0.264-0.272) | 0.949 (0.945-0.953) |
| AdaBoost                   | 0.37          | 2,284 (51.2)                                    | 0.91 (0.90-0.92)            | 0.529 (0.525-0.534)         | 0.139 (0.134-0.142) | 0.976 (0.973-0.979) |
|                            | 0.41          | 588 (13.2)                                      | 0.41 (0.39-0.43)            | 0.908 (0.904-0.912)         | 0.297 (0.295-0.299) | 0.951 (0.947-0.955) |
| Decision tree              | 0.04          | 2,065 (46.3)                                    | 0.90 (0.89-0.91)            | 0.498 (0.496-0.501)         | 0.129 (0.125-0.133) | 0.979 (0.976-0.982) |
|                            | 0.19          | 566 (12.7)                                      | 0.39 (0.37-0.41)            | 0.900 (0.897-0.904)         | 0.298 (0.294-0.302) | 0.948 (0.941-0.955) |
| Random forest              | 0.02          | 2,208 (49.5)                                    | 0.90 (0.89-0.91)            | 0.497 (0.491-0.503)         | 0.128 (0.124-0.132) | 0.976 (0.971-0.981) |
|                            | 0.22          | 499 (11.2)                                      | 0.38 (0.36-0.40)            | 0.910 (0.907-0.913)         | 0.283 (0.280-0.286) | 0.939 (0.936-0.942) |

CI=confidence interval, NPV=negative predictive value, PPV=positive predictive value.

Table S11. Area under the receiver operating characteristic curve (AUROC) and the 95% confidence interval of the machine learning models in training and validation cohorts to HCC, with dataset in 2000-2010 and 2011-2018 respectively.

| MACHINE LEARNING MODEL | *TRAINING COHORT:<br>N = 42,254, HCC = 3,231 |                               |                       | ^VALIDATION COHORT:<br>N = 18,109, HCC = 1,404 |                               |                       |
|------------------------|----------------------------------------------|-------------------------------|-----------------------|------------------------------------------------|-------------------------------|-----------------------|
|                        | <i>20 selected parameters</i>                | <i>36 selected parameters</i> | <i>All parameters</i> | <i>20 selected parameters</i>                  | <i>36 selected parameters</i> | <i>All parameters</i> |
|                        | Data set in 2000-2010                        |                               |                       |                                                |                               |                       |
| LOGISTIC REGRESSION    | 0.826±0.006                                  | 0.830±0.006                   | 0.835±0.006           | 0.827±0.009                                    | 0.829±0.009                   | 0.842±0.009           |
| RIDGE REGRESSION       | 0.827±0.005                                  | 0.835±0.005                   | 0.847±0.005           | 0.828±0.009                                    | 0.836±0.009                   | 0.854±0.009           |
| ADABOOST               | 0.829±0.006                                  | 0.829±0.006                   | 0.836±0.006           | 0.826±0.009                                    | 0.826±0.009                   | 0.841±0.009           |
| DECISION TREE          | 0.892±0.005                                  | 0.894±0.005                   | 0.896±0.005           | 0.784±0.010                                    | 0.792±0.010                   | 0.801±0.010           |
| ·RANDOM FOREST         | 0.984±0.003                                  | 0.988±0.003                   | 0.988±0.003           | 0.797±0.010                                    | 0.806±0.010                   | 0.824±0.010           |
|                        | Data set in 2011-2019                        |                               |                       |                                                |                               |                       |
| LOGISTIC REGRESSION    | 0.811±0.006                                  | 0.819±0.006                   | 0.818±0.006           | 0.802±0.009                                    | 0.811±0.009                   | 0.815±0.009           |
| ·RIDGE REGRESSION      | 0.816±0.005                                  | 0.830±0.005                   | 0.842±0.006           | 0.808±0.009                                    | 0.823±0.008                   | 0.836±0.008           |
| ADABOOST               | 0.824±0.006                                  | 0.831±0.006                   | 0.832±0.006           | 0.812±0.009                                    | 0.817±0.009                   | 0.821±0.009           |
| DECISION TREE          | 0.884±0.005                                  | 0.888±0.005                   | 0.893±0.005           | 0.776±0.010                                    | 0.778±0.010                   | 0.797±0.010           |
| ·RANDOM FOREST         | 0.992±0.003                                  | 0.995±0.003                   | 0.996±0.003           | 0.776±0.010                                    | 0.806±0.010                   | 0.802±0.010           |

\*AUROC of the five machine learning algorithms were overall difference in training cohort,  $P<0.05$ .

^AUROC of the five machine learning algorithms were overall difference in validation cohort,  $P<0.05$ .

· AUROC higher than decision tree in validation cohort,  $P<0.05$ .

Table S12. Accuracy of the machine learning models using selected parameters in diagnosing HCC in the training and validation cohorts. In the training cohort, dual cut-offs were selected to achieve >90% sensitivity and specificity, with dataset in 2000-2010.

| Machine learning algorithm   | Dual Cut-offs | n (%)<br>(< lower cut-off /<br>≥ upper cut-off) | Sensitivity (%)<br>(95% CI) | Specificity (%)<br>(95% CI) | PPV (%)<br>(95% CI) | NPV (%)<br>(95% CI) |
|------------------------------|---------------|-------------------------------------------------|-----------------------------|-----------------------------|---------------------|---------------------|
| Training cohort (n=42,254)   |               |                                                 |                             |                             |                     |                     |
| Logistic regression          | 0.17          | 23,200 (54.9)                                   | 0.90 (0.89-0.91)            | 0.586 (0.584-0.588)         | 0.152 (0.151-0.153) | 0.986 (0.984-0.988) |
|                              | 0.29          | 5,506 (13.0)                                    | 0.49 (0.48-0.50)            | 0.900 (0.898-0.902)         | 0.291 (0.289-0.293) | 0.955 (0.953-0.957) |
| Ridge regression             | 0.06          | 24,253 (57.3)                                   | 0.90 (0.89-0.91)            | 0.613 (0.610-0.616)         | 0.161 (0.158-0.164) | 0.986 (0.985-0.987) |
|                              | 0.15          | 5,641 (13.4)                                    | 0.53 (0.52-0.54)            | 0.900 (0.898-0.902)         | 0.308 (0.304-0.312) | 0.959 (0.955-0.958) |
| AdaBoost                     | 0.42          | 22,706 (53.7)                                   | 0.90 (0.89-0.91)            | 0.573 (0.570-0.576)         | 0.149 (0.147-0.151) | 0.986 (0.985-0.987) |
|                              | 0.46          | 5,532 (13.1)                                    | 0.52 (0.51-0.53)            | 0.901 (0.899-0.903)         | 0.305 (0.303-0.307) | 0.958 (0.957-0.959) |
| Decision tree                | 0.04          | 26,618 (63.0)                                   | 0.91 (0.90-0.92)            | 0.675 (0.672-0.678)         | 0.189 (0.187-0.191) | 0.989 (0.988-0.990) |
|                              | 0.17          | 6,019 (14.2)                                    | 0.68 (0.66-0.70)            | 0.902 (0.901-0.903)         | 0.366 (0.364-0.368) | 0.971 (0.969-0.973) |
| Random forest                | 0.35          | 39,103 (92.5)                                   | 0.90 (0.90-0.91)            | 0.993 (0.992-0.994)         | 0.923 (0.921-0.925) | 0.991 (0.989-0.993) |
|                              | 0.10          | 6,303 (14.9)                                    | 0.95 (0.94-0.96)            | 0.917 (0.915-0.918)         | 0.491 (0.489-0.493) | 0.996 (0.994-0.998) |
| Validation cohort (n=18,109) |               |                                                 |                             |                             |                     |                     |
| Logistic regression          | 0.18          | 10,204 (56.3)                                   | 0.90 (0.89-0.91)            | 0.602 (0.599-0.605)         | 0.159 (0.156-0.162) | 0.986 (0.984-0.988) |
|                              | 0.30          | 2,375 (13.1)                                    | 0.50 (0.48-0.52)            | 0.900 (0.896-0.902)         | 0.298 (0.295-0.301) | 0.955 (0.953-0.957) |
| Ridge regression             | 0.06          | 10,877 (60.1)                                   | 0.90 (0.89-0.91)            | 0.642 (0.638-0.646)         | 0.174 (0.170-0.178) | 0.987 (0.985-0.989) |
|                              | 0.15          | 2,439 (13.5)                                    | 0.54 (0.52-0.56)            | 0.900 (0.898-0.902)         | 0.315 (0.311-0.319) | 0.959 (0.956-0.962) |
| AdaBoost                     | 0.42          | 9,771 (54.1)                                    | 0.90 (0.89-0.91)            | 0.576 (0.574-0.578)         | 0.152 (0.149-0.155) | 0.986 (0.984-0.988) |
|                              | 0.46          | 2,372 (13.1)                                    | 0.53 (0.51-0.55)            | 0.903 (0.901-0.905)         | 0.317 (0.314-0.320) | 0.958 (0.956-0.960) |
| Decision tree                | 0.02          | 8,200 (45.1)                                    | 0.90 (0.89-0.91)            | 0.480 (0.478-0.482)         | 0.123 (0.121-0.125) | 0.978 (0.975-0.981) |
|                              | 0.19          | 2,047 (11.3)                                    | 0.46 (0.52-0.56)            | 0.906 (0.904-0.908)         | 0.320 (0.318-0.322) | 0.953 (0.951-0.955) |
| Random forest                | 0.01          | 9,133 (50.4)                                    | 0.90 (0.89-0.91)            | 0.538 (0.536-0.540)         | 0.140 (0.138-0.142) | 0.984 (0.982-0.986) |
|                              | 0.25          | 2,084 (11.5)                                    | 0.46 (0.44-0.48)            | 0.914 (0.911-0.917)         | 0.316 (0.310-0.322) | 0.953 (0.950-0.956) |

CI=confidence interval, NPV=negative predictive value, PPV=positive predictive value.

Table S13. Accuracy of the machine learning models using selected parameters in diagnosing HCC in the training and validation cohorts. In the training cohort, dual cut-offs were selected to achieve >90% sensitivity and specificity, with dataset in 2011-2019.

| Machine learning algorithm   | Dual Cut-offs | n (%)<br>(< lower cut-off /<br>≥ upper cut-off) | Sensitivity (%)<br>(95% CI) | Specificity (%)<br>(95% CI) | PPV (%)<br>(95% CI) | NPV (%)<br>(95% CI) |
|------------------------------|---------------|-------------------------------------------------|-----------------------------|-----------------------------|---------------------|---------------------|
| Training cohort (n=44,551)   |               |                                                 |                             |                             |                     |                     |
| Logistic regression          | 0.18          | 21,658 (48.6)                                   | 0.90 (0.89-0.91)            | 0.519 (0.516-0.522)         | 0.139 (0.136-0.142) | 0.983 (0.980-0.986) |
|                              | 0.29          | 5,894 (13.2)                                    | 0.50 (0.49-0.51)            | 0.90 (0.898-0.902)          | 0.304 (0.300-0.308) | 0.954 (0.951-0.957) |
| Ridge regression             | 0.06          | 24,212 (54.3)                                   | 0.90 (0.89-0.91)            | 0.581 (0.578-0.584)         | 0.156 (0.152-0.160) | 0.983 (0.980-0.986) |
|                              | 0.14          | 6,022 (13.5)                                    | 0.54 (0.51-0.57)            | 0.900 (0.898-0.902)         | 0.319 (0.316-0.322) | 0.958 (0.956-0.960) |
| AdaBoost                     | 0.42          | 22,283 (50.0)                                   | 0.91 (0.90-0.92)            | 0.535 (0.532-0.538)         | 0.145 (0.142-0.148) | 0.986 (0.984-0.988) |
|                              | 0.45          | 5,067 (11.4)                                    | 0.47 (0.45-0.49)            | 0.917 (0.911-0.923)         | 0.331 (0.328-0.334) | 0.952 (0.949-0.955) |
| Decision tree                | 0.03          | 27,733 (62.2)                                   | 0.90 (0.89-0.91)            | 0.667 (0.664-0.670)         | 0.189 (0.185-0.193) | 0.987 (0.985-0.989) |
|                              | 0.13          | 5,465 (12.3)                                    | 0.63 (0.62-0.64)            | 0.915 (0.913-0.917)         | 0.412 (0.409-0.415) | 0.967 (0.964-0.970) |
| Random forest                | 0.55          | 41,281 (92.7)                                   | 0.91 (0.89-0.93)            | 0.997 (0.996-0.998)         | 0.991 (0.989-0.993) | 0.992 (0.991-0.993) |
|                              | 0.10          | 6,352 (14.3)                                    | 0.98 (0.97-0.98)            | 0.930 (0.928-0.932)         | 0.548 (0.541-0.555) | 0.997 (0.997-0.998) |
| Validation cohort (n=19,094) |               |                                                 |                             |                             |                     |                     |
| Logistic regression          | 0.17          | 8,961 (46.9)                                    | 0.90 (0.89-0.91)            | 0.501 (0.498-0.504)         | 0.135 (0.132-0.138) | 0.983 (0.980-0.988) |
|                              | 0.29          | 2,519 (13.2)                                    | 0.50 (0.58-0.52)            | 0.900 (0.897-0.903)         | 0.302 (0.298-0.306) | 0.954 (0.951-0.957) |
| Ridge regression             | 0.06          | 10,190 (53.3)                                   | 0.90 (0.89-0.91)            | 0.571 (0.567-0.575)         | 0.153 (0.150-0.156) | 0.985 (0.983-0.987) |
|                              | 0.14          | 2,560 (13.4)                                    | 0.53 (0.50-0.56)            | 0.900 (0.897-0.903)         | 0.316 (0.311-0.321) | 0.956 (0.951-0.960) |
| AdaBoost                     | 0.41          | 9,626 (50.4)                                    | 0.90 (0.88-0.92)            | 0.539 (0.536-0.542)         | 0.145 (0.142-0.148) | 0.984 (0.981-0.987) |
|                              | 0.45          | 2,137 (11.2)                                    | 0.45 (0.43-0.47)            | 0.915 (0.913-0.917)         | 0.319 (0.317-0.322) | 0.951 (0.949-0.953) |
| Decision tree                | 0.01          | 7,563 (39.6)                                    | 0.90 (0.89-0.91)            | 0.453 (0.451-0.455)         | 0.125 (0.122-0.128) | 0.975 (0.971-0.979) |
|                              | 0.13          | 2,327 (12.2)                                    | 0.48 (0.45-0.51)            | 0.909 (0.904-0.914)         | 0.317 (0.314-0.320) | 0.953 (0.950-0.956) |
| Random forest                | 0.01          | 9,494 (49.7)                                    | 0.90 (0.89-0.91)            | 0.520 (0.517-0.523)         | 0.137 (0.132-0.142) | 0.978 (0.974-0.982) |
|                              | 0.25          | 2,049 (10.7)                                    | 0.46 (0.42-0.50)            | 0.923 (0.919-0.927)         | 0.342 (0.338-0.346) | 0.951 (0.948-0.954) |

CI=confidence interval, NPV=negative predictive value, PPV=positive predictive value.
